# Supplementary material
Source: publisher site journal article supplement (https://www.dovepress.com/article/366299)
Supplement: Supplementary file 1 [file get_supplementary_file.php]

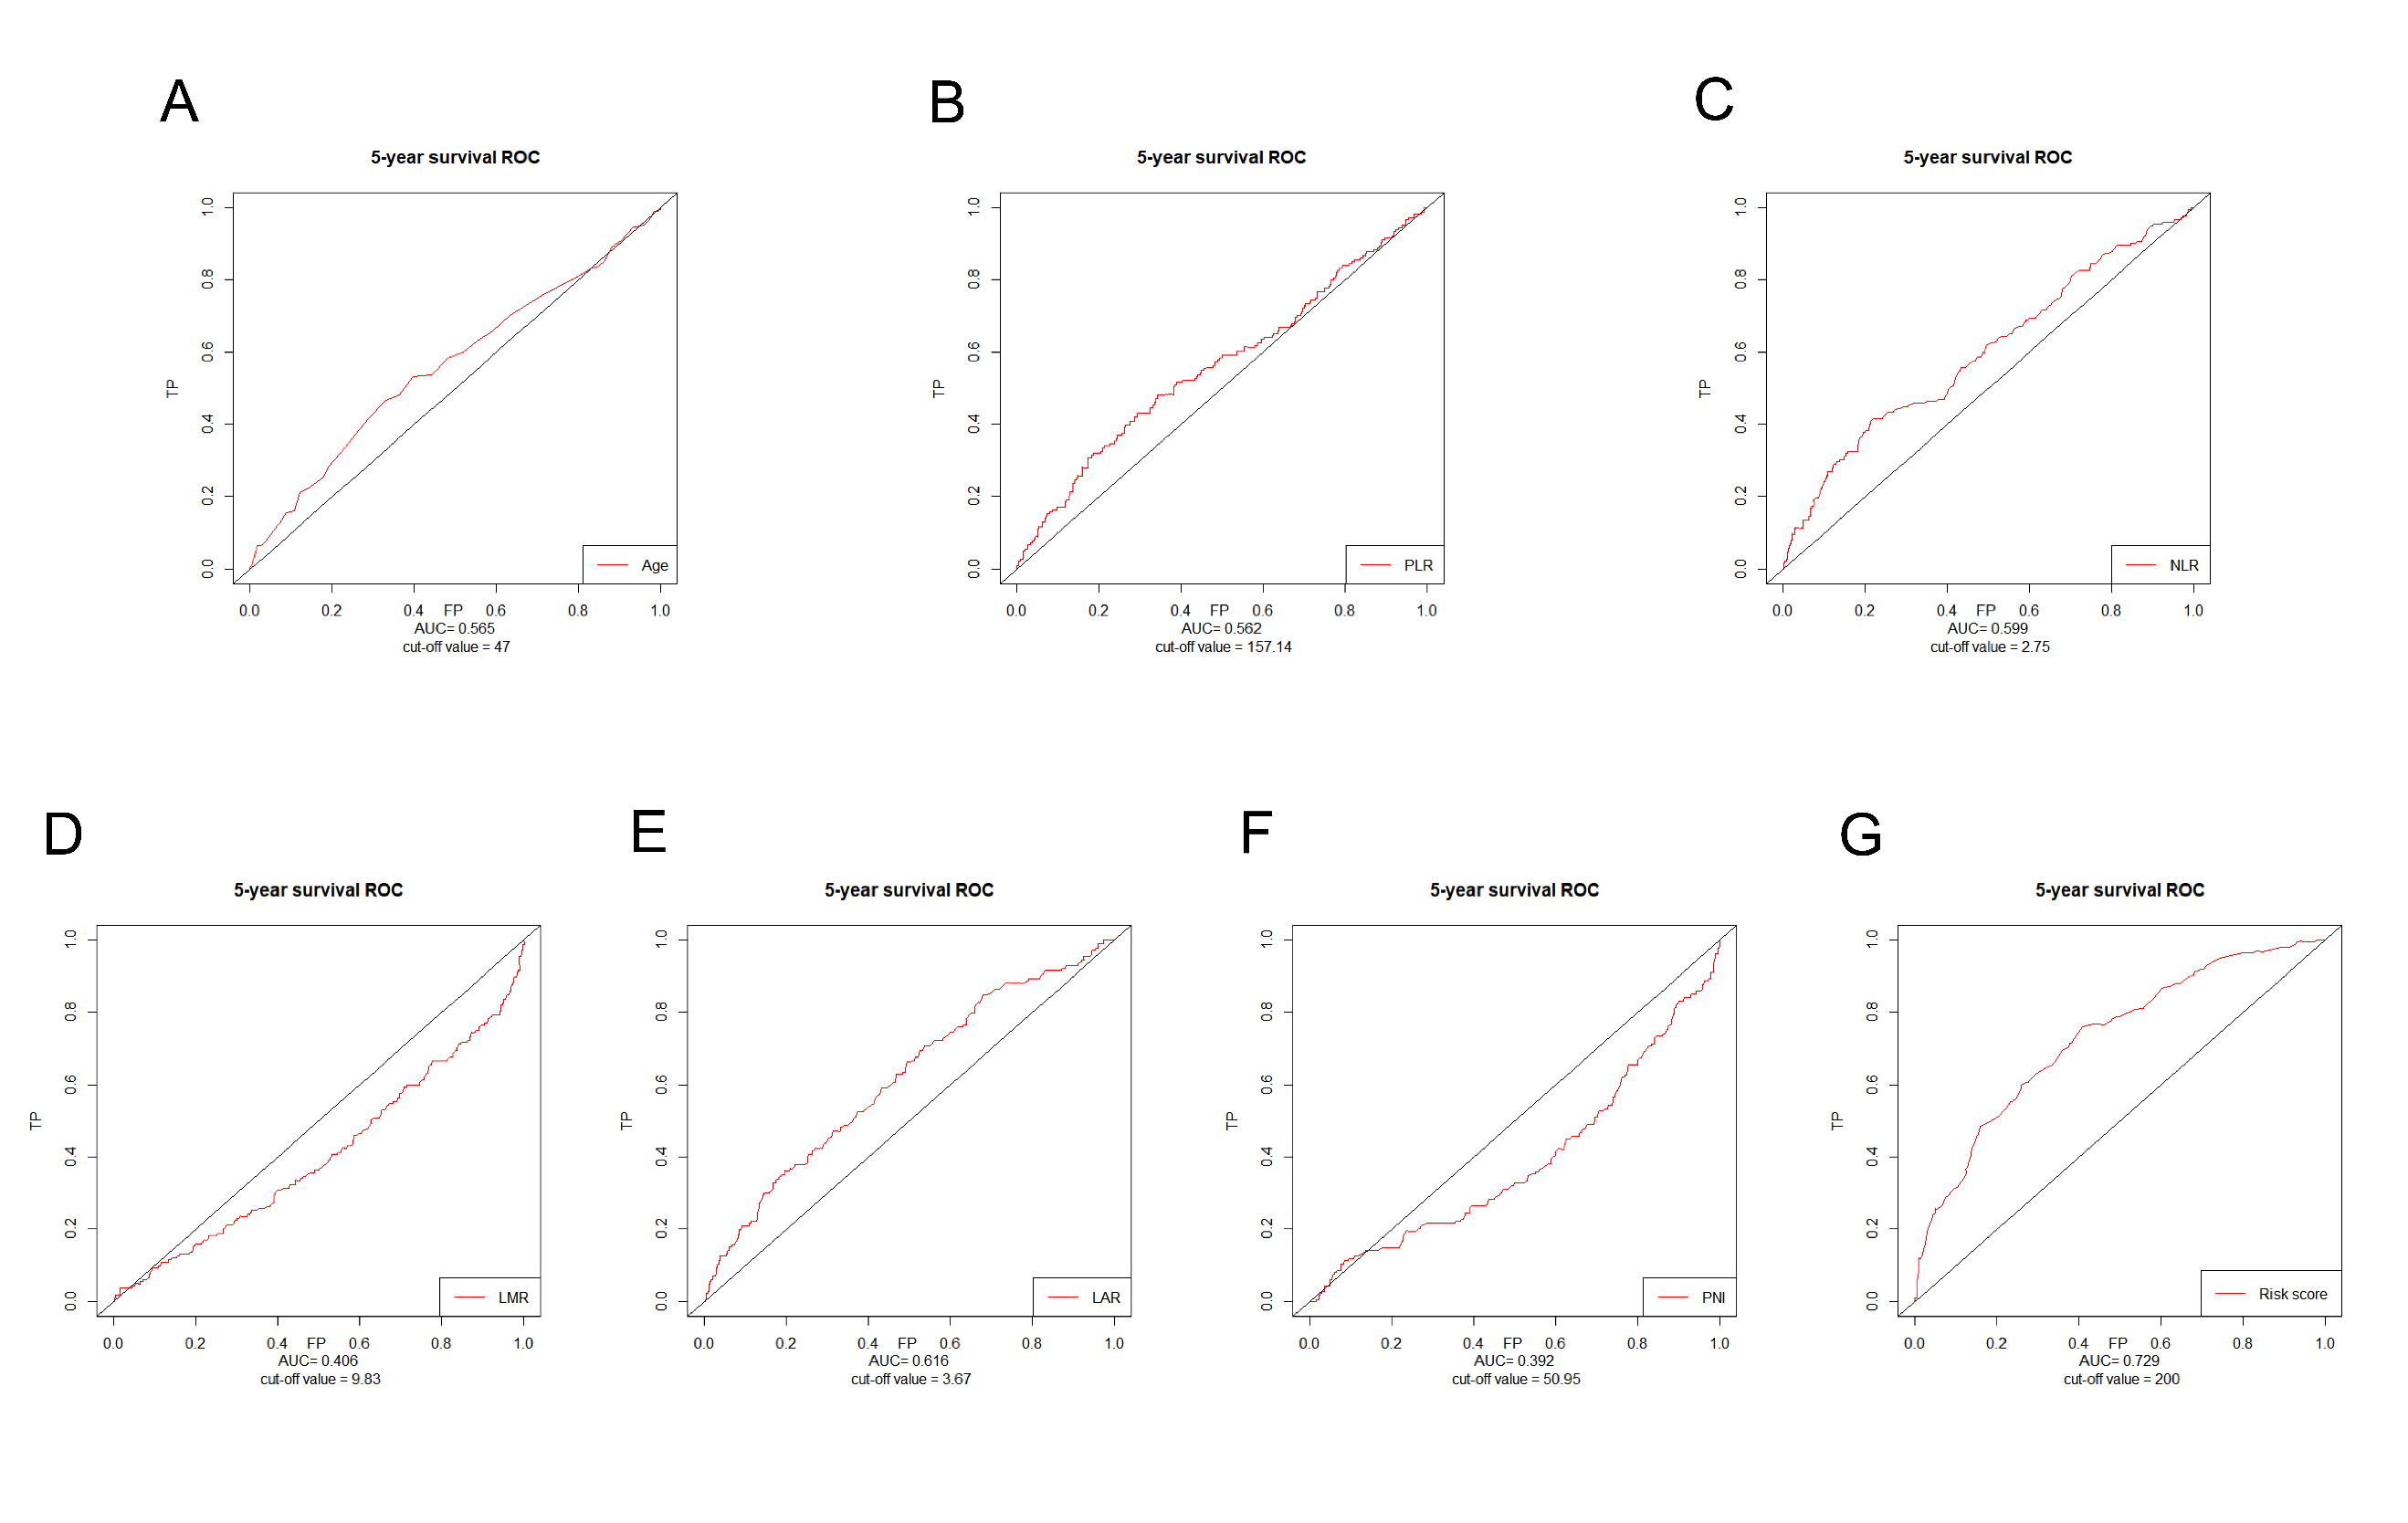


**Supplementary Figure:** 5-year Survival ROC Curves of Continuous Variables.

**Abbreviations:** PLR, platelet-to-lymphocyte ratio; NLR, neutrophil-to-lymphocyte ratio; LMR, lymphocyte-to-monocyte ratio; LAR, lactic dehydrogenase-to-albumin ratio; PNI, prognostic nutritional index.
